CORRECTION

## Correction: E2SVM: Electricity-Efficient SLA-aware Virtual Machine Consolidation approach in cloud data centers

Vaneet Kumar, Aleem Ali, Payal Mittal, Ibrahim Aqeel, Mohammed Shuaib, Shadab Alam, Mohammed Y. Aalsalem

The articles cited as References 7, 9 and 28 were erroneously included and should not be cited in the article [1], and Reference 10 is not appropriate.

The replacement references for 7, 9, 10 and 28 are cited here as [2–5], respectively. The authors apologize for the errors in the published article [1].

### References

1. Kumar V, Ali A, Mittal P, Aqeel I, Shuaib M, Alam S, et al. E2SVM: Electricity-Efficient SLA-aware Virtual Machine Consolidation approach in cloud data centers. PLoS One. 2024;19(6):e0303313. <https://doi.org/10.1371/journal.pone.0303313> PMID: 38857300
2. Basmadjian R, Niedermeier F, De Meer H. Modelling and analysing the power consumption of idle servers. In: 2012 Sustainable Internet and ICT for Sustainability (SustainIT); 2012 October 04-05; Pisa, Italy. IEEE; pp. 1-9
3. Mao L, Chen R, Cheng H, Lin W, Liu B, Wang JZ. A resource scheduling method for cloud data centers based on thermal management. J Cloud Comp. 2023;12(1). <https://doi.org/10.1186/s13677-023-00462-2>
4. Ding W, Luo F, Han L, Gu C, Lu H, Fuentes J. Adaptive virtual machine consolidation framework based on performance-to-power ratio in cloud data centers. Future Generation Computer Systems. 2020;111:254–70. <https://doi.org/10.1016/j.future.2020.05.004>
5. Zolfaghari R, Sahafi A, Rahmani AM, Rezaei R. Application of virtual machine consolidation in cloud computing systems. Sustainable Computing: Informatics and Systems. 2021;30:100524. <https://doi.org/10.1016/j.suscom.2021.100524>

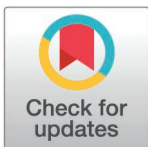

### OPEN ACCESS

**Citation:** Kumar V, Ali A, Mittal P, Aqeel I, Shuaib M, Alam S, et al. (2026) Correction: E2SVM: Electricity-Efficient SLA-aware Virtual Machine Consolidation approach in cloud data centers. PLoS One 21(4): e0346744. <https://doi.org/10.1371/journal.pone.0346744>

**Published:** April 8, 2026

**Copyright:** © 2026 Kumar et al. This is an open access article distributed under the terms of the [Creative Commons Attribution License](https://creativecommons.org/licenses/by/4.0/), which permits unrestricted use, distribution, and reproduction in any medium, provided the original author and source are credited.
